# Supplementary material for: Add Sugar to Chitosan: Mucoadhesion and In Vitro Intestinal Permeability of Mannosylated Chitosan Nanocarriers
Source: MDPI journal article supplement (doi:10.3390/pharmaceutics14040830), 2022-04-11
Supplement: s1 [file s1]

## *SUPPLEMENTARY MATERIALS*

### *Add sugar to chitosan: mucoadhesion and in vitro intestinal permeability of mannosylated chitosan nanocarriers*

Sadaf Ejaz,<sup>1</sup> Bridget Hogg,<sup>2</sup> Delyan R. Hristov,<sup>2</sup> David J. Brayden,<sup>2,3</sup>  
Muhammad Imran,<sup>1,\*</sup> Sourav Bhattacharjee<sup>2,\*</sup>

<sup>1</sup>Department of Biosciences, COMSATS University Islamabad (CUI), Park Road, Islamabad, Pakistan

<sup>2</sup>School of Veterinary Medicine, University College Dublin (UCD), Belfield, Dublin 4, Ireland

<sup>3</sup>Conway Institute of Biomolecular and Biomedical Research, University College Dublin (UCD), Belfield, Dublin 4, Ireland

\*Corresponding authors:

Muhammad Imran (Email: m.imran@comsats.edu.pk; T.: +92 322 6017784)

Sourav Bhattacharjee (Email: sourav.bhattacharjee@ucd.ie; T.: +353 1 716 6271)

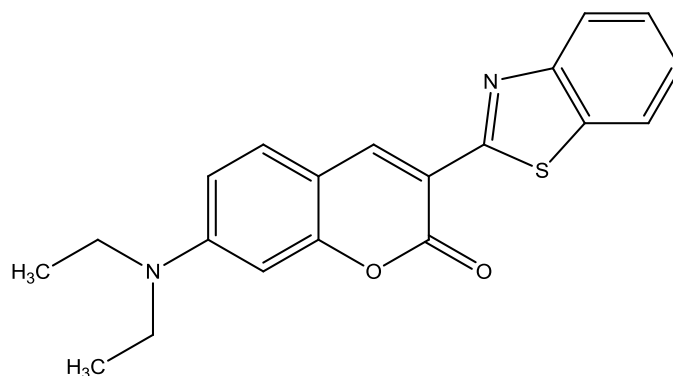

Molecular structure of C6

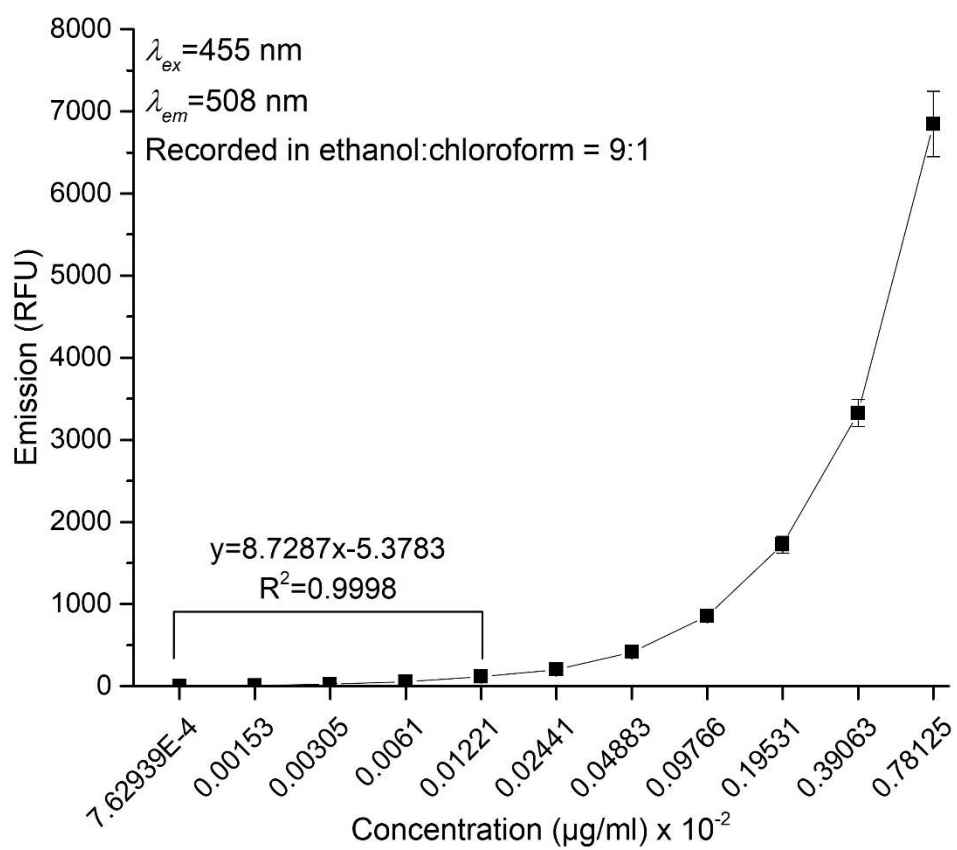

**Figure S1:** Development of a calibration curve for quantification of C6 based on emission spectrum. Results are shown as mean  $\pm$  SD ( $n=2$ ), and the equation of calibration curve is given within the figure.

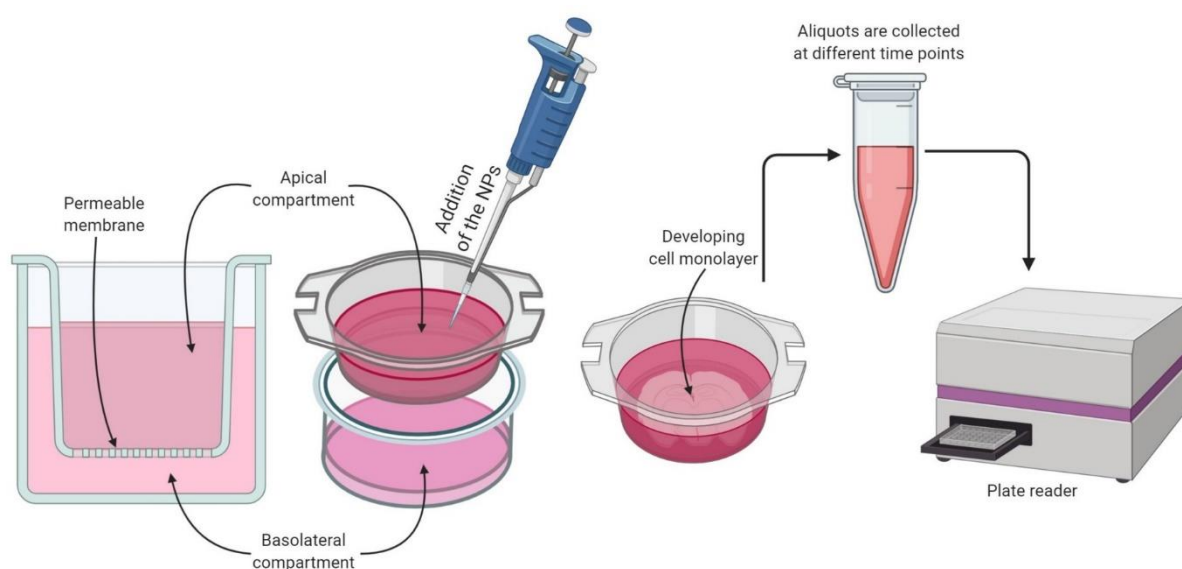

**Figure S2:** The principle of transwell experiments with Caco-2 monolayers.

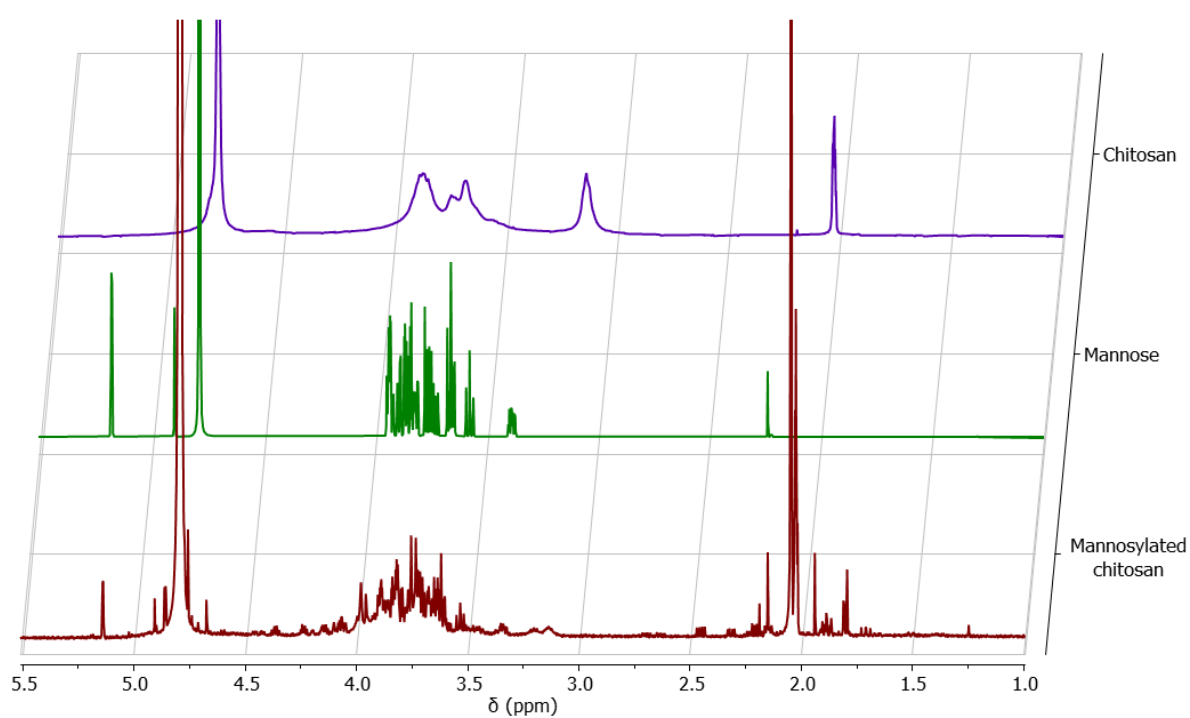

**Figure S3:** Stacked  $^1\text{H}$  spectra of chitosan, mannose and mannosylated chitosan.

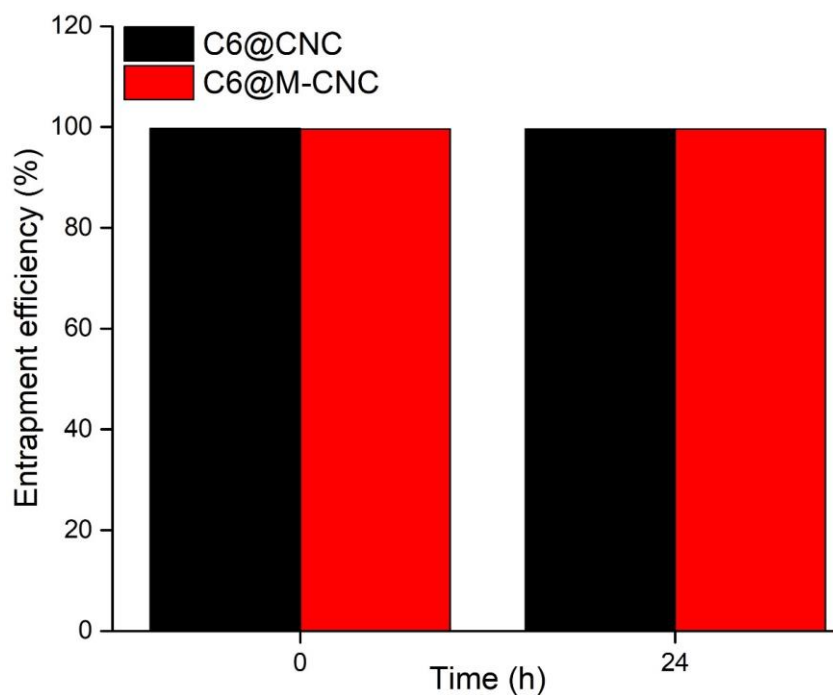

**Figure S4:** Entrapment efficiency (%) of C6 in C6@CNCs and C6@M-CNCs. Results are shown as mean  $\pm$  SD (n=3).

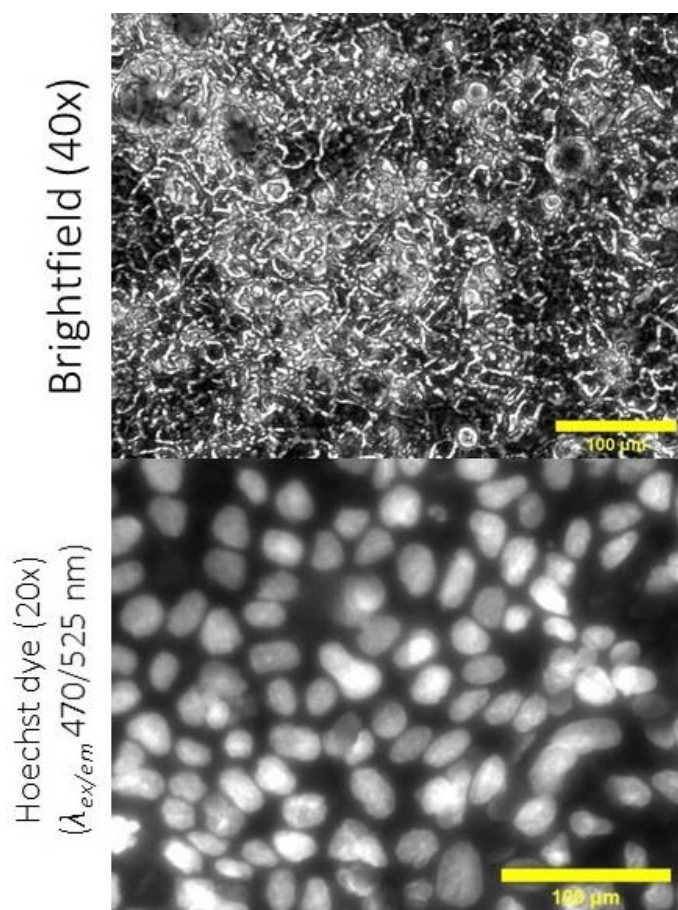

**Figure S5:** The brightfield (upper layer, 40 $\times$ ) and epifluorescence microscopy ( $\lambda_{ex/em}$ =470/525 nm, 20 $\times$ , lower layer) on Caco-2 monolayers stained with Hoechst dye to image the cellular nuclei. Scale bars (100  $\mu$ m) are embedded within the figures.
